# Supplementary material for: Skilled Nursing Facility Changes in Ownership and Short-Stay Medicare Patient Outcomes
Source: PubMed Central journal article supplement (PMC10509722; doi:10.1001/jamanetworkopen.2023.34551), 2023-09-19
Supplement: jamanetwopen-e2334551-s001.pdf [file jamanetwopen-e2334551-s001.pdf]

## Data Sharing Statement

Prusynski. Skilled Nursing Facility Changes in Ownership and Short-Stay Medicare Patient Outcomes. *JAMA Netw Open*. Published September 19, 2023.  
doi:10.1001/jamanetworkopen.2023.34551

### Data

**Data available:** No

### Additional Information

**Explanation for why data not available:** Data are provided by CMS through a data use agreement with the authors that does not allow sharing of research-identifiable files.
